# Supplementary material for: An herbal drug combination identified by knowledge graph alleviates the clinical symptoms of plasma cell mastitis patients: A nonrandomized controlled trial
Source: eLife journal article supplement (doi:10.7554/elife.84414), 2023-03-09
Supplement: supp [file Figure 7-SourceData_1.xlsx]

## Sheet: Treatment group
Symptom score
Before treatment	After treatment
12	2
16	2
12	4
14	14
12	2
14	2
14	14
14	4
14	4
12	6
16	4
12	2
16	2
12	4
18	4
12	2
16	2
12	2
18	4
12	4
16	4
14	6
16	2
16	2
10	4
16	4
10	4
14	4
14	2
14	2
16	2
10	2
12	4
16	4
16	4
16	4
16	4
18	4
16	4
12	4
14	4
14	4
12	4
16	4
12	4
16	4
16	4
14	4
12	4
10	2
14	4
14	4
14	14
16	4
16	4
14	4
16	4
16	14
16	4
14	2
8	4
16	16
16	6
16	4
14	4
14	6
16	16
14	6
8	2
14	6
16	16
16	4
10	2
12	6
16	6
10	6
12	2
12	4
10	4
10	4

## Sheet: Control group
Symptom score
Before treatment	After treatment
12	12
10	4
14	4
14	16
14	16
16	16
16	6
16	4
16	6
16	6
16	6
14	6
10	4
16	2
14	2
16	2
18	2
14	2
18	4
16	6
16	6
14	6
16	6
16	6
12	6
12	6
16	4
12	6
12	4
16	6
12	4
16	4
12	4
14	4
14	6
14	4
14	4
12	2
16	2
12	4
16	4
12	4
14	6
12	4
16	6
12	6
14	4
12	6
14	4
14	4
16	4
16	4
8	4
16	4
10	6
14	14
12	4
14	2
16	2
8	4
10	10
16	16
14	14
14	16
16	4
16	4
14	6
8	6
12	6
14	6
10	6
10	6
10	6
16	6
14	14
8	10
6	2
8	10
8	10
10	4
