# Supplementary material for: An herbal drug combination identified by knowledge graph alleviates the clinical symptoms of plasma cell mastitis patients: A nonrandomized controlled trial
Source: eLife journal article supplement (doi:10.7554/elife.84414), 2023-03-09
Supplement: supp [file Figure 7-SourceData_2.xlsx]

## Sheet: Treatment group
Pain score
Before treatment	After treatment
3	1
4	1
2	0
3	1
4	2
4	1
2	1
5	2
2	1
4	1
3	2
3	0
1	1
2	2
5	2
6	1
4	1
1	1
6	1
4	2
4	2
5	2
1	1
1	2
4	3
3	2
3	1
3	0
5	1
4	2
4	3
2	1
5	1
4	1
3	2
3	1
4	1
3	2
4	1
3	2
2	2
3	2
6	1
4	1
3	2
3	1
2	1
2	1
2	3
4	2
4	0
2	0
7	1
2	0
3	2
3	1
3	2
3	2
2	1
4	1
3	1
4	1
4	3
4	1
4	1
4	1
3	2
5	2.5
4	0.5
6	2
4	1
3.5	1
3	1
5	2
5	2
3	1
3	2
4	1
4	2
2	1

## Sheet: Control group
Pain score
Before treatment	After treatment
4	2
6	3
4	1
5	1
5	3
4	2
2	0
5	4
2	3
3	1
2	1
4	3
2	2
3	3
3	3
3	3
2	3
4	2
5	2
2	1
3	1
4	0
4	1
5	3
3	3
3	3
1	3
5	2
4	3
3	1
4	1
2	1
3	1
2	1
3	3
3	2
3	2
2	3
4	1
3	3
2	1
2	3
4	0
2	2
3	3
2	3
3	1
4	3
2	2
5	2
3	2
1	2
5	2
3	3
6	4
3	3
2	2
4	3
5	2
3	2
4	2
4	1
3	2
2	3
5	1
2	2
3	1
4	1
5	1
3	3
4	2
3	2
3	2
3	1
4	3
4	2
4	4
6	3
4	4
5	3
