# Supplementary material for: An herbal drug combination identified by knowledge graph alleviates the clinical symptoms of plasma cell mastitis patients: A nonrandomized controlled trial
Source: eLife journal article supplement (doi:10.7554/elife.84414), 2023-03-09
Supplement: supp [file Figure 7-SourceData_3.xlsx]

## Sheet: Treatment group
Quality of life score
Before treatment	After treatment
59	64
43	76
56	60
60	69
46	86
46	79
54	68
52	82
69	76
54	63
53	77
49	75
49	65
72	70
64	63
60	71
57	76
58	63
57	72
67	66
61	69
64	65
51	76
55	69
63	83
65	50
66	64
53	78
55	60
61	66
52	79
52	58
49	72
62	70
80	70
45	84
61	101
68	58
56	70
62	66
51	72
61	83
62	70
56	92
58	69
48	82
63	60
48	85
58	75
58	67
46	78
58	77
53	70
53	67
47	65
56	60
57	56
63	53
56	63
63	65
57	67
56	86
66	62
55	71
56	75
65	60
74	56
44	66
53	62
58	78
47	77
46	67
70	78.5
59	67
66	71
51	65
65	72
60	60
66	70
60	70

## Sheet: Control group
Quality of life score
Before treatment	After treatment
54	63
51	70
50	63
56	63
59	67
54	49
61	63
58	59
57	77
66	60
56	58
56	63
56	76
68	53
72	73
66	70
67	75
67	74
56	70
50	70
64	62
52	57
46	76
46	73
64	57
82	80
55	48
65	48
61	71
53	73
62	58
55	73
54	82
56	62
49	73
57	63
70	78
75	58
67	71
52	77
50	49
51	74
57	65
65	70
65	67
61	59
56	60
52	57
59	55
60	70
62	65
65	74
59	60
59	68
39	65
65	71
54	66
65	67
56	64
59	67
59	61
61	70
66	71
63	75
58	53
60	69
53	53
66	62
52	63
59	62
53	58
50	60
53	89
66	60
62	69
59	58
63	65
63	64
55	60
60	76
