# Supplementary material for: An herbal drug combination identified by knowledge graph alleviates the clinical symptoms of plasma cell mastitis patients: A nonrandomized controlled trial
Source: eLife journal article supplement (doi:10.7554/elife.84414), 2023-03-09
Supplement: supp [file Figure_5-Source_data.xlsx]

## Sheet: Treatment group
Before treatment										After treatment
IL-2	IL-4	IL-6	IL-10	IL-17	CRP	IFN-γ	IL-12p70	IL-1β	TNF-α	IL-2	IL-4	IL-6	IL-10	IL-17	CRP	IFN-γ	IL-12p70	IL-1β	TNF-α
3.62	5.49	6.98	12.75	8.44	29.48	9.12	0.02	19.58	13.28	2.64	2.63	2.27	1.1	4.72	15.66	6.21	2.29	7.72	2.52
6.15	4.83	3.1	6.08	7.99	29.63	9.17	0.02	1.04	14.54	2.22	3.75	2.58	1.68	7.83	13.39	5.3	6.87	9.5	2.24
2.11	6.78	5.79	11.88	14.79	26.12	9.74	5.6	12.09	12.11	2.01	3.24	2.69	1.56	3.2	14.4	5.86	7.79	7.8	2
4.49	4.22	4.34	15.26	8.16	21.1	6.29	5.78	10.6	5.57	2.21	2.16	2.49	2.02	5.48	13.83	5	3.26	16.11	1.57
3.94	4.38	4.91	10.73	8.46	25.1	14.06	5.41	14.99	10.39	2.41	3.96	1.6	2.15	7.85	11.83	6.3	3.22	4.29	1.92
5.27	4.2	4.56	10.21	14.18	37.03	10.91	0.02	10.38	15.78	1.85	3.08	2.12	2.1	6.81	6.83	6.23	7.77	9.35	1.24
5.49	3.99	5.57	10.92	13.43	30.65	11.97	0.02	10.7	12.24	1.94	3.69	2.38	2.64	4.56	11.95	7.99	5.38	4.08	2.66
6.79	6.24	4.92	11.72	10.21	20.47	9.92	8.09	11.21	10.61	2.59	2.25	1.58	3.38	8.99	12.37	6.54	6.4	3.84	2.69
7.35	5.3	4.76	12.58	18.73	25.24	10.55	5.41	19.9	9.08	1.99	3.71	2.34	2.04	7.23	7.12	6.82	0.02	2.84	2.69
6.16	6.64	5.46	13.63	11.77	16.25	8.03	0.02	3.12	17.18	1.41	2.68	2.45	1.64	7.58	11.11	7.68	5.14	5.77	1.38
2.01	5.36	8.23	5.46	14.28	26.54	12.59	0.07	14.58	14.95	2.31	3.36	2.11	1.42	3.25	12.04	4.72	4.8	7.42	1.94
2.52	7.77	5.57	12.71	15.89	22.86	10.2	6.88	11.38	18.22	1.76	2.66	2.59	2.02	5.01	14.32	8	9.46	6.78	2.97
4.39	5.86	6	10.8	12.11	26.91	9.45	0.03	15.63	18.3	2.23	2.1	2.92	1.94	8.5	16.59	5.97	6.47	4.03	1.61
5.52	6.62	6.01	14.74	6.17	19.69	4.2	0.07	9.77	13.93	1.42	2.81	3.03	2.07	4.22	15.67	8.39	9.84	5.47	2.85
4.71	4.88	3.32	18.17	13.29	26.77	7.2	4.92	12.93	8.02	1.77	2.73	2.53	2.79	9.52	11.3	5.8	4.54	5.51	2.62
3.34	5.27	3.87	9.76	12.53	25.82	15.65	0.07	17.51	10.05	2.8	2.11	2.02	2.93	7	13.2	5.58	11.06	3.78	1.68
4.44	5.32	5.24	15.17	15.2	25.94	11.46	0.03	11.41	17.66	1.22	3.2	1.58	3.12	7.51	7.52	5.72	6.98	10.25	2.14
6.25	4.09	5.04	13.41	15	29.84	11.19	0.01	13.94	5.95	1.84	2.86	2.51	2.75	7.6	19.88	7.06	8.79	8.44	2.32
2.73	3.27	7.27	9.53	14.04	17.05	7.92	0.08	12.96	10.66	1.28	2.65	2.29	2.45	6.45	12.99	6.51	3.62	6.78	1.92
3.5	2.31	6.59	9.32	13.73	32.22	13.07	5.29	13.12	5.71	2.26	2.44	3.02	2.61	4.94	9.65	7.58	7.95	3.54	2.71
5.08	7.37	4.75	12.52	7.21	24.34	8.63	0.09	15.3	15.33	1.54	2.05	2.59	2.32	9	9.76	5.57	4.27	9.46	1.59
3.76	4.9	3.51	12.85	14.12	23.15	8.8	8.13	15.31	10.94	2.53	1.61	1.96	3.91	7.65	9.19	7.3	5.89	8.8	1.62
2.95	6.39	2.94	11.75	15.57	16.97	10.52	0.15	25.08	19.52	1.64	1.94	2.22	2.79	6.36	17.04	7.77	5.9	7.05	2.12
4.56	4.5	5.44	8.74	7.21	26.35	10.76	0.02	10.67	13.03	2.73	2.3	2.65	2.1	3.72	12.54	7.09	6.23	9.53	2.58
6.46	6.59	5.51	16.5	13.34	21.99	8.4	5.76	14.45	12.96	1.97	1.97	2.43	1.88	6.24	14.56	5.7	1.93	8.81	1.95
4.34	6.51	5.8	8.13	14.9	23.3	9.32	0.05	7.96	7.38	2.63	2.63	2.87	1.75	4.03	12.24	5.93	8.18	6.09	2.26
6.45	4.17	4.85	11.82	9.11	20.62	9.45	0.03	7.37	11.93	1.21	1.21	2.65	2.27	4.61	16.47	5.85	8.54	7.08	2.96
5.91	7.34	6.33	11.86	8	21.91	10.69	0.06	7.17	10.28	1.19	3.19	2.6	2.22	3.02	14.89	6.95	3.48	2.69	1.96
5.19	4.6	5.36	12.72	19.01	21.86	9.77	0.04	14.9	15.03	2.07	2.07	1.27	2.47	4.8	15.28	6.41	5.12	8.46	1.77
3.45	7.57	2.09	10.9	14.29	27.94	8.74	0.02	14.42	18.06	2.54	2.54	2.4	1.57	6.99	13.91	7.61	-1.42	4.61	2.69
4.19	8.88	4.75	10.84	14.94	16.89	13.03	0.04	19.74	16.96	1.99	2.99	2.09	2.47	7.09	9.86	5.71	1.04	4.2	2.26
6.45	4.98	5.33	12.74	16.14	22.99	11.6	0.01	19.89	11.98	2.25	2.25	2.36	2.24	5.26	12.81	5.79	0.51	4.57	1.56
1.57	2.79	4.61	11.85	16.59	22.35	7.2	6.85	13.09	15.14	1.33	2.33	2.17	1.82	9.43	8.91	8.3	1.59	5.97	2.61
4.23	3.07	5.3	11.04	12.64	24.32	9.39	0.07	5.92	11.13	2.4	2.4	2.81	1.26	3.65	3.88	6.48	8.02	5.22	2.33
3.82	4.06	6.06	8.45	10.15	21.82	8.79	0.09	7.45	9.74	2.49	2.49	2.26	1.68	6.83	8.55	6.09	8.73	5.07	3.88
5.3	6.42	5.74	12.28	11.07	9.95	12.18	0.04	8.72	16.67	1.35	2.35	2.35	2.05	7.83	17.3	5.02	6.05	2.62	2.75
4.03	5.53	5.9	9.58	16.47	28.92	13.56	0.07	14.64	13.32	2.1	2.1	3.1	1.94	4.93	13.37	5.38	6.89	7.51	1.93
4.06	6.16	6.28	14.65	18.18	28.8	13.82	4.62	18.18	10.73	2.43	2.43	2.32	1.39	5.78	9.65	6.22	3.39	8.03	1.95
5.49	6.27	6.17	10.86	11.78	14.33	5.71	4.28	8.59	12.73	1.39	2.39	2.34	1.67	7.76	8.2	7.11	2.96	5.97	2.06
6.52	6.53	3.53	10	11.02	24.33	8.04	0.02	11.42	12.9	1.6	2.6	2.65	2.03	2.89	11.02	7.53	3.15	6.76	2.28
8.18	4.79	4.08	11.59	11.57	15.81	8.48	4.99	5.24	13.07	2.61	2.61	2.48	2.12	3.85	15.49	6.74	5.82	5.18	2.62
3.04	7.44	5.04	13.37	15.6	25.04	3.43	0.02	10.91	16.55	1.32	2.32	2.66	2.1	1.46	12.57	7.52	4.77	11.04	2.51
3.27	5.48	6.34	9.86	10.18	26.91	2.72	0.02	13.06	9.72	2.7	2.7	2.23	2.71	4.12	18.3	6.32	5.62	11.41	2.17
5.63	3.71	5.85	14.48	12.85	28.63	12.21	0.02	8.89	13.59	2.01	2.01	2.41	3.45	3.8	8.11	4.07	10.16	6.8	2.52
5.33	6.62	4.26	9.44	9.7	18.02	10.35	0.02	7.5	22.19	2.18	2.18	2.46	3.14	3.95	14.96	5.76	4.08	8.14	2.15
5.22	6.85	5.28	13.72	21.09	17.22	8.86	6.84	11.14	12.58	2.1	2.1	2.68	1.95	7.61	7.4	7.33	2.87	7.14	1.41
2.68	5.3	4.47	11.03	14.4	24.77	15.18	0.85	22.55	15.41	1.88	2.88	2.81	2.99	10.69	19.6	4.77	2.24	8.95	2.1
3.54	6.17	6.14	10.82	11.36	22.21	11.05	0.83	12.61	9.44	1.19	2.19	2.34	1.77	7.08	15.71	4.66	2.08	10.95	2.6
3.46	3.12	5.67	11.04	12.88	19.26	13.27	18.12	13.37	16.44	2.68	2.68	1.98	2.24	6.64	13.65	5.39	2.21	5.34	2.29
3.99	6.55	5.13	9.32	13.24	19.29	11.49	6.84	8.41	13.51	2.62	2.62	2.98	2.97	5.53	6.54	8.45	4.09	11.79	1.96
5.69	2.66	4.91	12.94	14.13	23.85	6.81	0.02	11.37	10.49	0.83	2.83	2.55	1.77	6.96	14.74	7.03	8.88	13.09	2.74
2.31	6.42	5.49	12.01	18.1	24.59	19.21	6.44	8.83	14.2	1.83	3.83	2.1	2.59	7.84	13.89	5.28	10.7	4.43	2.14
3.36	7.02	4.73	12.45	9.63	30.38	13.82	0.02	12.42	11.37	1.93	3.93	2.63	1.53	5.53	13.86	5.78	7.31	14.23	1.88
4.37	6.77	4.96	8.34	15.1	19.75	6.68	0.02	1.52	15.64	2.03	2.03	2.75	1.12	4.65	7.23	8.32	7.61	8.04	1.78
5.25	7.53	5.63	12.3	11.26	14.67	8.48	0.43	25.26	15.48	2.21	2.09	2.24	2.82	5.87	10.46	6.65	4.38	3.24	2.97
6.35	4.32	6.08	11.13	10.51	33.9	7.39	0.98	19.45	17.92	1.72	2.36	2.16	1.97	4.12	16.79	7.12	3.45	3.81	2.38
7.06	5.51	4.67	10.08	15.43	24.18	11.01	0.02	15.45	14.74	2.45	3.17	1.96	3.2	4.08	13.46	5.61	6.05	10.23	2.48
4.02	4.96	4.78	6.47	9.53	17.85	13.44	5.13	10.78	13.27	3.44	3.81	2.08	1.96	2.65	7.4	7.61	1.43	4.13	2.25
4.73	3.51	5.43	14.91	9.22	29.48	14.08	0.06	12.3	19.04	2.11	3.26	1.69	1.98	6.03	19.33	5.23	5.05	11.12	2.89
4.14	5.22	5.57	9.02	11.11	15.46	9.02	4.32	10.35	23.04	2.07	2.35	2.25	1.88	8.02	19.35	5.95	2.2	10.82	2.21
3.53	5.25	5.06	14.68	19.1	28.02	8.05	5.47	12.85	3.7	2.46	3.1	2.71	2.21	6.81	10.81	3.18	7	13.75	1.84
4.43	4.13	4.58	12.51	12.04	33.02	10.53	0.45	21.54	16.04	2.7	3.32	2.68	2.61	8.04	12.5	6.76	5.03	3.4	2.69
5.49	4.19	5.99	14.04	16.6	24.21	10.97	9.01	14.86	17.3	2.85	2.34	2.36	2.89	5.83	15.06	6.55	1.05	5.45	2.4
4.36	3.62	5.83	6.4	17.11	24.33	10.69	0.02	16.77	18.02	2.48	3.65	2.66	2.88	3.55	13.23	6.07	1.39	6.57	3.23
4.75	4.89	5.17	10.26	15.66	20.56	10.99	0.02	17.59	7.44	2.34	3.48	2.1	2.53	11.45	7.5	8.85	5.04	8.92	2.83
5.28	5.92	3.47	8.51	13.83	24.75	10.76	6.62	16.68	16.82	1.81	3.86	2.81	2.05	6.75	15.81	5.75	5.07	7.06	2.53
3.21	3.27	5.22	17.63	8.9	23.44	15.23	0.06	21.93	17.2	1.95	2.65	2.73	1.6	8.97	7.07	7.29	1.34	3.8	3.46
6.03	9.69	1.31	10.64	11.01	24.81	12.83	0.02	13.88	10.36	1.9	2.44	1.11	2.08	5.51	13.86	7.88	7.79	10.58	2.03
2.34	3.95	5.33	14.6	11.18	26.42	10.47	0.02	10.82	10.72	2.07	2.05	3.2	1.65	5.25	7.42	5.97	1.91	2.17	2.52
3.1	6.13	5.36	11.23	9.57	14.51	9.49	0.46	10.31	8.59	2.27	2.27	2.86	1.74	3.04	14.84	3.92	5.72	8.01	1.83
2.96	3.75	5.72	15.04	11.73	27.22	10.74	0.02	10.25	15.61	2.66	2.66	2.65	2.37	3.51	13.17	3.54	5.84	8.39	1.61
3.07	4.16	5.13	11.63	13.41	14.57	10.57	0.02	11.21	14.16	2.81	3.81	2.44	1.93	8.81	7.88	7.05	0.43	8.85	4.2
4.33	6.32	5.14	11.72	13.52	19.91	10.52	0.02	11.33	9.47	2.63	3.53	2.05	1.93	5.17	6.38	6.9	6.88	8.57	2.96
3.37	4.55	5.22	11.4	14.95	23.24	12.63	0.02	14.8	14.89	1.5	2.8	1.61	2.61	3.39	9.93	4.88	8.4	3.76	2.51
4.37	6.2	3.66	11.43	11.76	23.88	16.8	15.84	13.59	10.08	1.65	2.65	1.94	2.96	5.44	12.87	6.11	7.34	14.49	1.58
4.23	4.25	5.71	15.54	5.87	25.31	7.81	4.55	13.53	13.63	2.9	3.9	2.3	2.27	5.27	12.66	7.79	9.81	3.23	1.24
3.2	3.73	12.5	2.66	4.54	23.14	8.1	3.28	6.01	3.34	2.16	2.59	2.58	1.44	10.91	7.32	8.47	2.17	1.35	2.27
3.16	5.32	7.62	2.3	5.56	15.25	5.59	3.55	12.24	3.63	0.92	1.72	2.63	1.21	2.71	13.82	2.82	0.82	1.35	1.01
1.96	1.93	6.92	1.65	1.68	25.04	2.38	1.49	1.48	2.97	11.89	3.64	2.68	3.58	17.18	12.1	8.24	2.36	12.39	2.76
3.27	4.04	8.66	3.51	3.96	21.76	6.42	4.24	10	3.77	1.04	1.62	2.75	0.92	7.75	7.58	2.41	0.9	1.35	0.8

## Sheet: Control group
Before treatment										After treatment
IL-2	IL-4	IL-6	IL-10	IL-17	CRP	IFN-γ	IL-12p70	IL-1β	TNF-α	IL-2	IL-4	IL-6	IL-10	IL-17	CRP	IFN-γ	IL-12p70	IL-1β	TNF-α
3.46	3.12	5.67	11.04	12.88	19.26	13.27	0.03	13.37	16.44	3.68	3.68	3.98	2.24	6.64	13.65	7.99	1.21	5.34	2.59
3.99	5.55	6.13	9.32	13.24	19.29	11.49	5.34	9.41	13.51	3.62	3.62	2.98	2.97	5.53	6.54	11.45	0.09	11.79	1.96
5.69	2.66	4.91	12.94	14.13	23.85	6.81	0.03	11.37	12.49	0.83	2.83	2.55	2.47	6.96	12.74	7.93	5.88	13.09	2.74
2.31	6.42	5.49	12.01	18.1	24.59	19.21	0.04	8.83	14.2	1.83	2.83	3.1	2.59	7.84	12.89	7.98	5.7	4.43	2.54
3.36	7.02	4.23	12.45	9.63	24.38	17.82	0.03	12.42	11.37	1.93	2.93	2.63	2.43	5.53	13.86	7.78	7.31	14.23	2.58
4.37	6.77	4.96	8.34	15.1	19.75	10.68	0.03	1.52	15.64	3.03	2.03	2.75	2.42	4.65	7.23	11.32	8.61	8.04	2.58
5.25	7.53	6.63	12.3	11.26	14.67	8.48	4.43	25.26	15.48	2.21	2.21	3.24	2.82	5.87	10.46	6.65	4.38	7.24	2.97
6.35	4.32	7.08	11.13	10.51	33.9	7.39	3.98	18.45	17.92	1.72	2.72	2.16	1.97	4.12	12.79	7.12	0.45	7.81	2.38
7.06	5.51	4.67	10.08	15.43	24.18	11.01	0.03	15.45	14.74	2.45	2.45	1.96	3.2	4.08	13.46	7.61	6.05	10.23	1.48
4.02	4.96	4.78	6.47	9.53	17.85	13.44	5.13	8.78	13.27	3.44	3.44	2.08	1.96	2.65	11.4	7.61	0.43	4.13	2.25
4.73	3.51	5.43	14.91	9.22	29.48	11.08	0.03	12.3	19.04	2.11	2.11	1.69	1.98	6.03	19.33	7.23	6.05	11.12	2.89
4.14	5.22	6.57	9.02	11.11	15.46	9.02	4.32	6.35	23.04	2.07	2.07	2.25	1.88	8.02	19.35	7.95	0.2	10.82	2.21
3.53	5.25	5.06	14.68	19.1	28.02	8.05	5.47	12.85	3.7	2.46	2.46	2.71	2.21	6.81	10.81	7.18	7	11.75	1.84
4.43	4.13	4.58	12.51	12.04	33.02	6.03	3.45	21.54	15.04	2.7	2.7	2.68	2.61	8.04	12.5	6.76	5.03	3.4	2.69
5.49	4.19	5.99	13.04	16.6	25.21	6.97	7.01	14.86	17.3	2.85	2.85	3.36	2.89	5.83	15.06	6.55	0.35	5.45	1.4
4.36	3.62	6.83	6.4	17.11	26.33	7.69	0.03	15.77	17.02	2.48	2.48	2.66	2.88	3.55	13.23	6.67	0.39	6.57	2.23
4.75	4.89	5.17	10.26	15.66	20.56	5.99	0.03	17.19	7.44	2.34	2.34	2.1	2.53	11.15	10.5	8.85	5.34	8.82	1.83
5.28	5.92	3.47	8.51	13.83	26.75	10.76	5.12	16.68	16.82	1.81	1.81	2.81	2.05	6.75	12.41	7.75	5.37	7.06	1.53
3.21	2.77	7.22	13.63	8.9	23.44	15.23	0.03	21.93	17.2	1.95	3.95	2.73	1.6	6.97	9.47	7.29	0.34	4.8	3.46
6.03	9.69	3.31	8.64	11.01	28.81	12.83	0.87	13.88	10.36	1.9	3.9	2.11	2.08	5.51	13.56	7.88	7.79	10.58	2.03
2.34	2.95	5.33	14.6	11.18	26.42	7.47	3.84	5.82	10.72	2.07	2.07	3.2	1.65	5.75	10.72	5.97	4.91	6.17	2.52
3.1	7.13	5.36	11.23	9.27	21.21	9.49	4.96	5.31	8.59	2.27	2.27	2.86	0.74	5.04	12.84	7.92	7.72	8.01	1.83
2.96	1.75	5.72	13.04	11.73	27.22	6.74	0.08	5.75	17.61	2.66	2.66	2.65	2.37	4.51	12.17	5.54	8.84	8.39	1.61
2.07	4.16	8.13	10.63	13.41	18.77	6.17	0.63	11.21	17.16	2.81	2.81	2.44	1.53	6.01	7.88	8.55	0.43	8.25	3.2
5.33	7.82	6.14	10.72	13.52	20.91	7.22	0.88	10.33	9.47	2.73	2.73	2.05	1.73	5.17	8.38	6.9	6.88	8.57	2.96
2.37	4.55	4.22	11.4	16.95	26.24	11.63	3.38	13.3	18.89	1.4	2.4	1.61	3.61	3.39	9.93	5.88	8.4	4.76	2.51
4.37	6.2	3.66	11.43	11.46	26.68	14.8	9.84	13.59	10.58	1.65	2.65	1.94	2.96	5.44	12.87	6.11	7.34	12.49	1.58
6.23	4.25	5.71	14.24	8.87	25.31	7.81	4.55	13.53	11.63	2.9	2.9	2.3	1.27	5.27	12.66	7.79	9.81	6.23	2.24
3.62	5.49	6.88	12.75	8.44	29.48	9.12	0.03	19.58	13.28	2.64	2.64	2.27	1.1	4.72	12.66	6.21	0.29	7.72	2.52
6.15	4.83	3.1	6.08	7.99	29.63	9.17	0.03	1.04	14.54	2.22	2.22	2.58	1.68	7.83	13.39	7.3	6.87	9.5	2.24
2.11	6.78	5.79	11.88	14.79	26.12	9.74	5.6	12.09	12.11	2.01	2.01	2.69	1.56	3.2	14.4	5.86	7.79	7.8	2
4.49	4.22	4.34	15.26	8.16	21.1	6.29	5.78	9.6	5.57	2.21	2.21	2.49	2.02	5.48	12.83	5	0.26	12.11	2.57
3.94	4.38	4.91	10.73	8.46	25.1	14.06	5.41	14.99	10.39	2.41	2.41	1.6	2.15	7.85	11.83	6.3	0.22	8.29	1.92
5.27	4.2	4.56	10.21	14.18	37.03	10.91	0.03	9.38	15.78	1.85	2.85	2.12	2.4	6.81	6.83	6.23	7.77	9.35	2.24
5.49	3.99	5.57	10.92	13.43	30.65	11.97	18.65	6.7	12.24	1.94	3.94	2.38	2.64	4.56	11.95	7.99	5.38	6.08	2.66
6.79	6.24	4.92	11.72	10.21	20.47	9.92	8.09	11.21	10.61	2.59	2.59	1.58	3.18	8.99	12.37	6.54	6.4	8.84	2.69
7.35	5.3	4.76	12.58	18.73	25.24	8.15	5.41	19.9	9.08	1.99	3.99	2.34	2.44	7.23	7.12	6.82	0.02	8.84	1.69
6.16	6.64	5.46	13.63	11.77	16.25	8.03	3.61	3.12	17.18	1.41	2.41	2.45	2.64	7.58	11.11	7.68	5.14	5.77	2.38
2.01	5.36	8.23	5.46	14.28	26.54	12.59	0.03	14.58	14.95	2.31	2.31	2.11	2.42	3.25	12.04	7.72	4.8	7.42	1.94
2.52	7.77	5.57	12.71	15.89	22.86	10.2	6.88	11.38	18.22	1.76	2.76	2.59	2.42	5.01	14.32	8	9.46	6.78	2.97
4.39	5.86	6	10.8	12.11	26.91	9.45	0.03	15.63	18.3	2.23	2.23	2.92	2.44	8.5	12.59	5.97	6.47	4.03	2.61
5.52	6.62	6.01	14.74	6.17	19.69	4.2	0.03	9.77	13.93	1.42	2.42	3.03	2.07	4.22	12.67	8.39	9.84	5.47	2.85
4.71	4.88	3.32	18.17	13.29	26.77	7.2	4.92	12.93	8.02	1.77	2.77	2.53	2.79	9.52	11.3	5.8	4.54	5.51	2.62
3.34	5.27	3.87	9.76	12.53	25.82	15.65	0.03	17.51	10.05	2.8	2.8	2.02	2.93	7	13.2	7.58	11.06	8.78	2.68
4.44	5.32	5.24	15.17	15.2	25.94	11.46	0.03	11.41	17.66	1.22	3.22	1.58	3.12	7.51	7.52	5.72	6.98	10.25	2.14
6.25	4.09	5.04	13.41	15	29.84	11.19	0.03	13.94	5.95	1.84	3	2.51	2.75	7.6	12.88	7.06	5.79	8.44	2.32
2.73	3.27	7.27	9.53	14.04	14.05	7.92	0.03	12.96	10.66	1.28	2.28	2.29	2.45	6.45	12.99	6.51	0.62	6.78	1.92
3.5	4.31	6.59	9.32	13.73	22.22	17.07	0.03	13.12	5.71	3.26	3.26	3.02	2.61	4.94	9.65	7.58	5.95	8.54	2.71
5.08	7.37	2.75	12.52	7.21	24.34	8.63	0.03	15.3	15.33	1.54	2.54	2.59	2.32	9	9.76	5.57	4.27	9.46	2.59
3.76	4.9	2.01	12.85	14.12	23.15	8.8	15.13	15.31	10.94	3.53	3.53	2.96	3.91	7.65	9.19	7.3	5.89	8.8	2.62
2.95	6.39	2.04	11.75	15.57	16.97	10.52	0.5	25.08	19.52	3.64	2.64	2.22	2.79	6.36	10.04	7.77	5.9	17.05	2.52
4.56	4.5	5.44	8.74	7.21	26.35	10.76	0.03	10.67	13.03	3.73	3.73	2.65	2.1	3.72	10.54	9.09	5.23	9.53	2.58
6.46	6.59	5.51	16.5	13.34	21.99	10.4	4.76	14.45	12.96	1.97	2.97	2.43	2.48	6.24	10.56	7.7	0.93	8.81	2.55
4.34	6.51	5.8	8.13	14.9	23.3	9.32	0.03	7.96	9.38	3.63	3.63	2.87	2.45	4.03	12.24	7.93	5.18	6.09	2.26
6.45	4.17	2.85	11.82	11.11	20.62	9.45	0.53	7.37	11.93	2.21	2.71	2.65	2.27	6.61	11.47	7.85	5.54	17.08	2.96
5.91	5.34	6.33	10.86	11	21.91	10.69	1.03	7.17	11.28	2.19	2.79	2.6	2.42	6.02	10.89	7.95	3.48	8.69	1.96
5.19	4.6	5.36	12.72	19.01	21.86	9.77	0.03	14.9	15.03	2.07	2.77	3.27	2.47	6.8	10.28	7.41	5.12	18.46	2.77
3.45	5.57	2.09	10.9	14.29	24.94	8.74	3.91	14.42	15.06	3.54	3.54	2.4	2.57	6.99	10.91	9.61	0.42	4.61	2.69
4.19	5.88	2.75	10.84	14.94	11.89	17.03	0.03	15.74	16.96	1.99	3.99	2.59	2.47	7.09	5.86	7.71	0.04	4.2	2.56
6.45	5.98	5.33	13.74	16.14	22.99	11.6	0.01	14.89	11.98	3.25	4.25	2.36	2.24	6.26	12.81	7.79	0.51	4.57	2.56
1.57	2.79	1.61	11.85	16.09	22.35	10.2	6.85	13.09	15.14	2.33	3.33	2.57	2.82	14.43	5.91	8.3	0.59	5.97	3.61
4.23	3.07	5.3	11.04	12.64	24.32	9.39	0.03	10.92	11.13	2.4	4.4	2.81	2.46	4.5	3.88	7.48	5.02	5.22	2.53
3.82	4.06	7.06	8.45	10.15	21.82	8.79	0.03	7.45	11.74	3.49	4.49	2.26	3.68	6.83	4.55	7.99	5.73	5.07	3.88
5.3	6.42	5.74	12.28	11.07	9.95	19.18	0.03	8.72	16.67	3.35	3.35	2.35	3.45	14.83	12.3	7.92	6.05	2.62	3.75
4.03	5.53	5.9	7.58	19.47	28.42	13.56	0.03	12.64	13.32	2.1	3	3.1	3.94	6.93	12.87	10.38	6.89	7.51	3.93
4.06	6.16	6.28	14.65	18.18	23.8	18.82	0.62	13.18	10.73	3.93	4.43	2.32	2.39	5.78	4.65	7.92	0.39	10.03	3.95
6.49	6.27	6.17	10.86	11.78	16.33	10.71	0.03	10.59	12.73	1.39	2.39	2.34	3.87	7.76	5.2	12.11	0.96	10.97	3.56
7.52	5.53	2.53	10	11.32	24.3	10.04	3.07	10.42	12.9	1.6	3.6	2.65	2.43	6.89	11.02	8.93	0.15	6.76	3.28
8.18	5.79	2.08	12.59	11.57	11.81	10.48	2.09	10.24	13.07	3.61	4.61	3.88	2.42	3.85	12.49	8.94	4.82	7.58	3.72
1.04	5.44	5.04	16.37	15.3	25.04	10.43	0.03	10.91	14.55	1.32	3.02	2.66	2.4	6.46	12.57	18.52	4.77	15.04	3.51
2.27	5.48	6.34	5.86	12.18	24.91	10.72	0.03	13.06	13.72	3.7	4.7	2.53	2.71	4.12	11.3	9.32	5.12	16.31	2.57
7.63	4.71	5.85	16.48	12.85	24.63	15.21	0.03	10.89	13.59	2.01	4.01	2.41	3.45	6.8	5.11	8.07	5.16	4.8	3.52
5.33	5.62	2.26	7.44	13.7	11.52	10.35	0.03	11.5	20.19	3.18	4.18	2.46	3.14	6.95	12.96	12.76	0.58	12.14	2.15
8.22	5.85	5.28	13.92	21.09	10.22	10.86	0.03	11.14	12.58	2.1	3.78	4.68	2.45	7.1	5.4	12.33	0.87	6.14	2.41
1.68	5.3	2.47	10.03	14.1	24.27	15.18	3.85	22.55	13.41	1.88	4.88	2.81	2.99	12.69	12.6	12.77	0.24	8.95	2.5
2.54	6.17	6.64	10.82	11.36	22.21	10.05	3.83	12.61	10.44	2.19	3.79	2.34	2.47	7.08	15.71	7.66	0.58	16.95	3.6
2.15	2.09	9.42	1.87	2.77	21.52	4.16	1.94	5.06	2.63	1.08	1.87	3.14	1.37	12.12	6.34	7.19	1.2	2.23	1.22
2.48	2.35	4.34	1.98	4.39	15.81	4.08	1.97	1.48	2.83	1.75	1.92	3.15	1.92	5.3	12.76	5.28	1.2	2.23	1.72
1.81	2.95	9.28	2.1	3.08	13.95	3.32	2.28	1.48	1.89	1.53	1.81	3.37	1.07	15.02	11.89	3.59	1.2	2.23	1.22
2.65	2.81	25.58	6.02	31.33	22.16	15.55	6.39	56.23	9.28	27.85	4.97	3.51	5.17	25	12.86	17.06	2.4	62.9	10.38
