# Supplementary material for: An herbal drug combination identified by knowledge graph alleviates the clinical symptoms of plasma cell mastitis patients: A nonrandomized controlled trial
Source: eLife journal article supplement (doi:10.7554/elife.84414), 2023-03-09
Supplement: supp [file Figure_6-Source_data.xlsx]

## Sheet: Treatment group
Before treatment		After treatment
IgA	IgG	IgA	IgG
1.39	14.16	2.31	19.01
3.81	13.1	0.64	14.29
0.07	13.25	2.75	14.94
3.03	11.8	0.33	16.14
6.19	15.39	2.71	16.59
3.84	13.44	0.8	12.64
4.01	14.89	2.98	10.15
5.87	12.06	3.2	11.07
2.97	14.81	2.62	16.47
3.98	16	1.48	18.18
1.56	13.56	1.04	11.78
1.4	11.25	1.75	11.02
4.01	18.41	2	11.57
3.22	15.44	1.45	15.6
1.08	9.51	3.62	10.18
3.96	13.52	2.13	12.85
2.92	17.78	1.5	9.7
2.11	12.1	3.74	21.09
3.88	11.15	1.83	14.4
2.72	14.15	1.95	11.36
4	14.75	4.12	12.88
4.62	13.38	3.11	13.24
1.19	13.25	3.17	14.13
3.49	14.73	1.43	18.1
0.41	13.92	2.72	9.63
4.61	17.27	1.74	15.1
3.39	13.2	2.41	11.26
3.94	17.32	3.44	10.51
6.41	14.6	3.89	15.43
2.03	10.38	1.03	9.53
0.97	9.63	4.97	9.22
2.81	14.76	1.06	11.11
3.35	11.38	3.32	19.1
3.68	13.24	2.14	12.04
5	17.45	2.42	16.6
3	16.68	0.26	17.11
0.46	18.17	3.01	15.66
2.77	10.96	4.19	13.83
5.81	0.18	0.96	8.9
2.01	9.82	2.83	11.01
6.94	8.86	2.73	11.18
3.03	12.02	0.43	9.27
5.04	17.37	0.46	11.73
3.61	13.33	3.19	13.41
0.91	14.93	0.95	13.52
2.35	13.03	0.73	16.95
2.68	12.76	0.42	11.46
4.51	10.4	4.42	8.87
2.64	16.68	2.57	8.44
1.3	12.96	0.8	7.99
0.64	15.09	2.5	14.79
3.98	11.53	0.57	8.16
1.56	17.31	2.73	8.46
3.6	10.41	4.42	14.18
1.38	10.83	2.82	13.43
4.42	14.18	3.99	10.21
4.21	13.1	3.74	17.73
4.3	7.35	2.86	11.77
4.37	14.71	2.36	14.28
0.06	5.1	0.89	12.89
3.65	5.97	3.98	12.11
3.79	12.71	2.36	6.17
4.52	11.67	1.05	13.29
0.07	12.41	2.61	12.53
4.96	12.35	2.15	12.7
3.41	13.79	2.88	15
3.01	16.36	0.22	14.04
1.02	6.99	2.22	13.73
4.71	13.33	2.31	7.21
3.37	13.81	2.34	14.12
4.29	8.11	2.38	15.57
4.85	13.6	0.75	7.21
2.89	14.32	0.79	13.34
2.22	8.91	2.87	13.9
3.39	6.45	2.84	10.11
1.45	17.3	2.5	8
2.8	15.83	1.41	13.35
3.43	14.72	2.49	9.56
3.59	9.94	1.64	12.75
2.3	12.09	1.32	13.5

## Sheet: Control group
Before treatment		After treatment
IgA	IgG	IgA	IgG
2.64	16.68	2.57	8.44
1.3	12.96	1.8	7.99
0.64	15.09	2.5	14.79
3.98	11.53	1.57	8.16
1.56	14.31	2.73	8.46
3.6	10.41	4.42	14.18
2.88	10.83	2.82	13.43
7.42	14.18	4.79	10.21
4.21	13.1	3.54	18.73
4.3	7.35	2.86	11.77
4.37	14.71	2.36	14.28
2.06	11.1	1.89	15.89
3.65	15.97	3.78	12.11
3.79	12.71	4.36	6.17
4.52	11.67	2.05	13.29
0.07	12.41	2.61	12.53
5.46	12.35	3.15	15.2
3.41	13.79	3.88	15
3.01	16.36	2.22	14.04
2.52	8.99	4.22	13.73
4.71	12.33	2.31	7.21
3.37	13.81	2.34	14.12
4.29	6.11	2.38	15.57
5.35	17.6	1.95	7.21
2.89	14.32	1.99	13.34
2.22	8.91	2.87	14.9
3.39	10.45	2.84	9.11
1.45	19.3	2.5	8
1.39	14.16	2.31	19.01
3.81	13.1	1.64	14.29
0.07	13.25	2.75	14.94
3.03	11.8	1.33	16.14
6.19	15.39	2.71	16.59
3.84	13.44	0.8	12.64
4.01	14.89	2.98	10.15
5.87	12.06	3.2	11.07
2.97	14.81	2.62	16.47
3.98	16	1.48	18.18
1.56	13.56	1.04	11.78
1.4	11.25	1.75	11.02
4.01	18.41	2	11.57
3.22	15.44	1.45	15.6
1.08	9.51	3.62	10.18
3.96	13.52	2.13	12.85
2.92	17.78	1.5	9.7
2.11	12.1	3.74	21.09
3.88	11.15	1.83	14.4
2.72	14.15	1.95	11.36
4	14.75	4.12	12.18
4.62	13.38	3.11	13.24
1.19	13.25	3.17	14.13
3.49	14.73	1.43	18.1
2.41	13.92	2.72	9.63
4.61	14.27	1.74	15.1
3.39	13.2	1.41	11.26
3.94	14.32	3.44	10.51
4.41	14.6	3.89	15.03
2.03	10.38	1.03	9.53
1.97	4.63	4.97	9.62
2.81	14.76	0.06	11.11
3.35	11.38	5.32	19.1
3.68	13.24	2.14	12.04
5	17.45	2.42	16.6
4	16.68	0.26	17.11
1.46	14.17	5.01	15.66
2.77	6.96	5.19	13.83
4.81	0.18	0.96	8.9
2.01	9.82	2.83	11.01
4.94	5.86	4.23	11.18
3.03	12.02	0.43	9.27
4.04	12.37	1.96	11.73
3.61	13.33	4.19	13.41
0.91	12.93	0.95	13.52
2.35	13.03	0.23	16.95
2.68	12.76	1.42	11.46
4.51	12.4	5.42	8.87
2.21	12.44	3.28	13.8
1.61	12.35	1.89	12.9
2.17	14.76	6.42	14.9
1.65	13.05	1.53	15.45
