# Supplementary material for: An herbal drug combination identified by knowledge graph alleviates the clinical symptoms of plasma cell mastitis patients: A nonrandomized controlled trial
Source: eLife. 2023 Mar 14;12:e84414. doi: 10.7554/eLife.84414 (PMC10063228; doi:10.7554/eLife.84414)
Supplement: Supplementary file 3. [file elife-84414-supp3.xlsx]

## Sheet: Sheet1
序号	Age (years)	Height (cm)	Weight (kg)	BMI (kg/㎡)	Reproductive age (years)	Clinical classification	Feeding history	Mastitis history	Nipple status	Breast trauma history	Fetal sex	Treatment (days)	Recurrence
A	33	164	61.12	22.7246	32	Abscess type	Yes	Yes	Normal	Yes	Female	60	No
B	32	160	64.02	25.0078	27	Mass type	Yes	Yes	Normal	No	Male	60	No
C	28	166	73	26.4915	26	Fistula type	Yes	No	Normal	Yes	Male	60	No
D	37	163	67	25.2174	30	Fistula type	No	No	Normal	Yes	Female	60	No
E	34	158	51	20.4294	33	Mass type	Yes	No	Normal	No	Male	60	No
F	29	159	64	25.3155	27	Abscess type	No	Yes	Normal	Yes	Male	60	No
